1 **Faecal virome of the Australian grey-headed flying fox from**  
2 **urban/suburban environments contains novel coronaviruses,**  
3 **retroviruses and sapoviruses**

4  
5 Kate Van Brussel<sup>a</sup>, Jackie E. Mahar<sup>a</sup>, Ayda Susana Ortiz-Baez<sup>a</sup>, Maura Carrai<sup>b</sup>, Derek  
6 Spielman<sup>c</sup>, Wayne S. J. Boardman<sup>d</sup>, Michelle L. Baker<sup>e</sup>, Julia A. Beatty<sup>b</sup>, Jemma L.  
7 Geoghegan<sup>f</sup>, Vanessa R. Barrs<sup>b,g\*</sup> and Edward C. Holmes<sup>a\*</sup>

8  
9 <sup>a</sup>Sydney Institute for Infectious Diseases, School of Life & Environmental Sciences and  
10 School of Medical Sciences, The University of Sydney, NSW, 2006, Australia.

11 <sup>b</sup>Jockey Club College of Veterinary Medicine & Life Sciences, City University of Hong  
12 Kong, Kowloon Tong, Hong Kong, SAR China.

13 <sup>c</sup>School of Veterinary Science, Faculty of Science, University of Sydney, Sydney, NSW  
14 2006, Australia.

15 <sup>d</sup>School of Animal and Veterinary Sciences, Faculty of Science, Engineering and  
16 Technology, University of Adelaide, Adelaide, SA 5371, Australia.

17 <sup>e</sup>CSIRO Australian Centre for Disease Preparedness, Health and Biosecurity Business Unit,  
18 Geelong, VIC 3220, Australia.

19 <sup>f</sup>Department of Microbiology and Immunology, University of Otago, Dunedin 9010, New  
20 Zealand; Institute of Environmental Science and Research, Wellington 5022, New Zealand.

21 <sup>g</sup>Centre for Animal Health and Welfare, City University of Hong Kong, Kowloon Tong,  
22 Hong Kong, China.

23

24

25 \*Corresponding authors: [edward.holmes@sydney.edu.au](mailto:edward.holmes@sydney.edu.au), [vanessa.barrs@cityu.edu.hk](mailto:vanessa.barrs@cityu.edu.hk)

26 **ABSTRACT**

27 Bats are important reservoirs for viruses of public health and veterinary concern. Virus  
28 studies in Australian bats usually target the families *Paramyxoviridae*, *Coronaviridae* and  
29 *Rhabdoviridae*, with little known about their overall virome composition. We used  
30 metatranscriptomic sequencing to characterise the faecal virome of grey-headed flying foxes  
31 from three colonies in urban/suburban locations from two Australian states. We identified  
32 viruses from three mammalian-infecting (*Coronaviridae*, *Caliciviridae*, *Retroviridae*) and  
33 one possible mammalian-infecting (*Birnaviridae*) family. Of particular interest were a novel  
34 bat betacoronavirus (subgenus *Nobecovirus*) and a novel bat sapovirus (*Caliciviridae*), the  
35 first identified in Australian bats, as well as a potentially exogenous retrovirus. The novel  
36 betacoronavirus was detected in two sampling locations 1,375 km apart and falls in a viral  
37 lineage likely with a long association with bats. This study highlights the utility of unbiased  
38 sequencing of faecal samples for identifying novel viruses and revealing broad-scale patterns  
39 of virus ecology and evolution.

40

41 **Keywords**

42 Coronavirus, sapovirus, retrovirus, faecal, mammalian, grey-headed flying fox

## 43 **1. Introduction**

44 Bats (order Chiroptera) are one of the largest mammalian orders with a unique physiology  
45 adapted for flight. The number of bat colonies in urban habitats has increased in recent  
46 decades, leading to more frequent interactions with humans, companion animals and  
47 livestock that have in turn facilitated outbreaks of zoonotic disease (Plowright et al., 2011).  
48 This process has been dramatically highlighted by the emergence of severe acute respiratory  
49 syndrome coronavirus 2 (SARS-CoV-2) and the detection of SARS-like coronaviruses in  
50 Asian bat populations (Temmam et al., 2022, Zhou et al., 2021, Zhou et al., 2020,  
51 Wacharapluesadee et al., 2021, Murakami et al., 2020). In addition, bats have been associated  
52 with the emergence of Hendra virus (Halpin et al., 2000), Nipah virus (Yob et al., 2001),  
53 lyssaviruses (Botvinkin et al., 2003, Gould et al., 1998) and SARS-CoV (Li et al., 2005). In  
54 turn, these outbreaks have led to increased sampling of bat species, and the widespread use of  
55 metagenomic sequencing has enabled more detailed exploration of the bat virome (Wu et al.,  
56 2016, Hardmeier et al., 2021, Van Brussel and Holmes, 2022).

57  
58 In Australia, bat species of the genus *Pteropus* are reservoir hosts for Hendra virus and  
59 Menangle virus, zoonotic pathogens of the family *Paramyxoviridae* (Halpin et al., 2000,  
60 Philbey et al., 1998), as well as Australian bat lyssavirus, a zoonotic virus of the  
61 *Rhabdoviridae* that causes rabies in mammals (Gould et al., 1998). Studies of viruses in bats  
62 in Australia have largely focused on these virus families and recently identified a new  
63 member of the *Paramyxoviridae* – Cedar virus – as well as a novel genotype of Hendra virus  
64 (Wang et al., 2021, Marsh et al., 2012). Although important, these studies lack information  
65 on overall virome composition, particularly those virus families not included in targeted PCR  
66 studies.

67  
68 The grey-headed flying fox (*Pteropus poliocephalus*), a member of the megabat family  
69 Pteropodidae and native to Australia, is a species of importance in the context of zoonotic  
70 viruses. Grey-headed flying foxes are distributed throughout the eastern coastline of Australia  
71 (Queensland, New South Wales and Victoria) and more recently a colony was established in  
72 Adelaide (South Australia). Grey-headed flying foxes feed on fruit, pollen and nectar and  
73 roost in large colonies, sometimes sharing roosting locations with other species of *Pteropus*,  
74 allowing intraspecies and interspecies virus transmission (Timmiss et al., 2021). Roosting  
75 sites are commonly located alongside human communities including in densely populated

76 urban settings (Williams et al., 2006). As numerous viruses are transmitted by faeces and  
77 other excretions, the co-habitation between bats and humans likely increases the risk of  
78 zoonotic spill-over.

79

80 Herein, we used metatranscriptomic sequencing of faecal samples to describe the community  
81 of viruses present in the gastrointestinal tract of grey-headed flying foxes from three  
82 sampling locations in two Australian states – Centennial Park and Gordon in Sydney, New  
83 South Wales, and the Botanic Park, Adelaide in South Australia. Specifically, to reveal the  
84 composition and abundance of viruses in bats residing in metropolitan areas we sampled  
85 roosting sites either located in a residential setting or in parks that are frequented by humans.

86

## 87 **2. Methods**

### 88 **Sample collection**

89 Faecal samples were collected from grey-headed flying fox roosting sites in three regions of  
90 Australia: Centennial Parklands, Centennial Park New South Wales (NSW), Gordon NSW,  
91 and Botanic Park, Adelaide parklands, Adelaide, South Australia (Table 1, Fig. 1A).

92 Sampling was conducted over two dates in 2019 for the Centennial Park and Gordon sites,  
93 while the roosting site in the Adelaide parklands was sampled over several months in 2019  
94 (Table 1). A plastic sheet of approximately 3 x 5 metres was placed under densely populated  
95 trees the night before collection. The following morning samples captured by the plastic sheet  
96 were placed into 2 mL tubes and immediately stored at -80°C until processing. Any faecal  
97 sample touching or submerged in urine was discarded.

98

99 **Table 1.** Sampling overview, including number of samples allocated to sequencing pools and  
100 sequencing metadata.

| <b>Location</b>                                                      | <b>Sampling date</b> | <b>Pool no.</b> | <b>No. of samples</b> | <b>No. of reads</b> | <b>No. of contigs</b> |
|----------------------------------------------------------------------|----------------------|-----------------|-----------------------|---------------------|-----------------------|
| <b>Centennial Park,</b><br><b>NSW</b><br>33. 89999°S,<br>151.23592°E | 5 February 2019      | 01              | 12                    | 24,732,494          | 159,527               |
|                                                                      |                      | 02              | 9                     | 35,835,953          | 147,425               |
|                                                                      |                      | 03              | 9                     | 31,960,624          | 107,431               |
|                                                                      | 26 February 2019     | 04              | 9                     | 19,833,973          | 111,196               |
|                                                                      |                      | 05              | 11                    | 31,410,836          | 136,180               |
|                                                                      |                      | 06              | 9                     | 29,318,213          | 105,118               |

|                                                  |               |    |    |            |         |
|--------------------------------------------------|---------------|----|----|------------|---------|
|                                                  |               | 07 | 10 | 19,160,704 | 90,339  |
| <b>Gordon, NSW</b><br>33.75065°S,<br>151.16242°E | 12 March 2019 | 01 | 12 | 52,605,108 | 89,247  |
|                                                  |               | 02 | 12 | 48,784,843 | 50,574  |
|                                                  |               | 03 | 9  | 27,396,450 | 118,509 |
|                                                  | 26 March 2019 | 04 | 11 | 36,591,148 | 181,524 |
|                                                  |               | 05 | 12 | 36,815,461 | 146,466 |
|                                                  |               | 06 | 12 | 52,934,611 | 97,013  |
|                                                  |               | 07 | 10 | 37,980,832 | 156,960 |
| <b>Adelaide, SA</b><br>34.91571°S,<br>138.6068°E | 2019          | 01 | 8  | 25,977,712 | 135,969 |
|                                                  | 2019          | 02 | 9  | 21,113,731 | 113,546 |

101

102

### 103 **RNA extraction, sequencing and read processing**

104 Faecal samples were homogenised using the Omni Bead Ruptor 4 with 1.44 mm ceramic  
105 beads (Omni international). Total RNA was extracted from each sample individually using  
106 the RNeasy Plus Mini Kit (Qiagen) following the manufacturer’s protocol. RNA was pooled  
107 in equimolar ratios and separated by sampling location, date and RNA concentration (Table  
108 1). Ribosomal RNA was depleted, and libraries constructed using the Illumina Stranded Total  
109 RNA Prep with Ribo-Zero Plus (Illumina) preparation kit. Libraries were sequenced as 150  
110 bp paired-end on the Illumina Novaseq 6000 platform at the Australian Genome Research  
111 Facility (AGRF). Read ends with a quality score of below 25 phred and adapter sequences  
112 were removed using cutadapt v1.8.3 (Kechin et al., 2017). Sortmerna v4.3.3 was used to  
113 remove 5S and 5.8S, eukaryotic 18S and 23S, bacterial 16S and 23S, and Archaea 16S and  
114 23S ribosomal RNA (rRNA) reads (Kopylova et al., 2012). The filtered reads were then *de*  
115 *nov*o assembled using Megahit v1.1.3 (Li et al., 2015) and contigs were compared to the non-  
116 redundant protein database using diamond v2.0.9. The Genemark heuristic approach  
117 (Besemer and Borodovsky, 1999, Zhu et al., 2010) and information from closely related  
118 viruses were used to predict genes and annotate genomes. Intact retrovirus genomes were  
119 detected using an in-house pipeline (Chang et al., manuscript in preparation). The Geneious  
120 assembler (Geneious Prime version 2022.1.1) was used to reassemble megahit contigs from  
121 multiple libraries for bat faecal associated retrovirus 2 (see Results). The final sequence for  
122 bat faecal associated retrovirus 2 (see Results) was determined by mapping reads from all

123 libraries to the reassembled genome on Geneious Prime using a 0% (majority) threshold for  
124 the final consensus sequence.

125

### 126 **Abundance estimation**

127 Virus and host abundance were estimated by mapping non-rRNA reads from each library to  
128 assembled contigs, and to the COX1 gene (accession no. KF726143) from the *P. alecto*  
129 (Black flying fox) genome using Bowtie2 v2.3.4.3 (Langmead and Salzberg, 2012). The  
130 impact of index-hopping was minimised by excluding the read abundance count for a contig  
131 in any library that was less than 0.1% of the highest read count for that assembled contig in  
132 any other library.

133

### 134 **Phylogenetic analysis**

135 Virus amino acid sequences were aligned with related sequences (i.e., representing the same  
136 virus family and/or genus) retrieved from the NCBI/GenBank database using MAFFT v7.450  
137 (Kato and Standley, 2013) and the E-INS-I algorithm (Kato et al., 2005). The partial RdRp  
138 sequence of *P. alecto*/Aus/SEQ/2009 was retrieved from Smith et al. (2016). The gappyout  
139 method in TrimAL v1.4.1 was used to remove ambiguous regions in the alignment (Capella-  
140 Gutiérrez et al., 2009). Maximum likelihood trees of each data set were inferred using IQ-  
141 TREE v1.6.7 (Nguyen et al., 2014), employing the best-fit amino acid substitution model  
142 determined by the ModelFinder program (Kalyaanamoorthy et al., 2017) in IQ-TREE. Nodal  
143 support was assessed using 1000 ultrafast bootstrap replicates (Hoang et al., 2017). Any virus  
144 sequence with over 90% nucleotide similarity to another detected here was excluded from the  
145 phylogenetic analysis.

146

## 147 **3. Results**

### 148 **Virome overview**

149 In total, 164 faecal samples allocated to 16 libraries underwent metatranscriptomic  
150 sequencing. This generated 19,160,704 to 52,934,611 reads per library (average of  
151 33,278,293 reads) after read filtering (Table 1). Reads were *de novo* assembled into 50,574 to  
152 181,524 contigs (average of 121,689 contigs) per library (Table 1). A total of 5,933 contigs  
153 were assigned as of viral origin across all the libraries. The samples collected at Centennial  
154 Park, Sydney produced the most viral contigs, with 3,216 identified from 65 virus families  
155 (Supplementary Fig. 1). The Gordon, NSW sample site produced 2,399 virus contigs from 66

156 virus families, while the Adelaide site contained 318 virus contigs from 33 virus families,  
157 although this site had only two sequencing libraries comprising 17 faecal samples, compared  
158 to seven sequencing libraries in each of the other two locations (69 faecal samples from  
159 Centennial Park, 78 from Gordon) (Table 1, Supplementary Fig. 1). Screening of the NCBI  
160 protein database revealed assembled virus contigs were mostly associated with infection of  
161 invertebrates (29.9% of total contigs), fungi (25.6%), plants (24.4%), and oomycetes (13%),  
162 representing 79 virus families (Fig. 1B, Supplementary Fig. 1). These viruses were most  
163 likely associated with host diet and differed in frequency depending on sampling site (Fig.  
164 1B, Supplementary Fig. 1). The plant, fungal, and oomycete-associated viruses, as well as  
165 those likely to be bacteriophage (including the picobirnaviruses) were not considered further.  
166 Importantly, however, we also identified sequences from viruses likely associated with  
167 mammalian infection (3% overall), including near complete genomes from members of the  
168 *Coronaviridae*, *Caliciviridae* and *Retroviridae* (Fig. 1B).

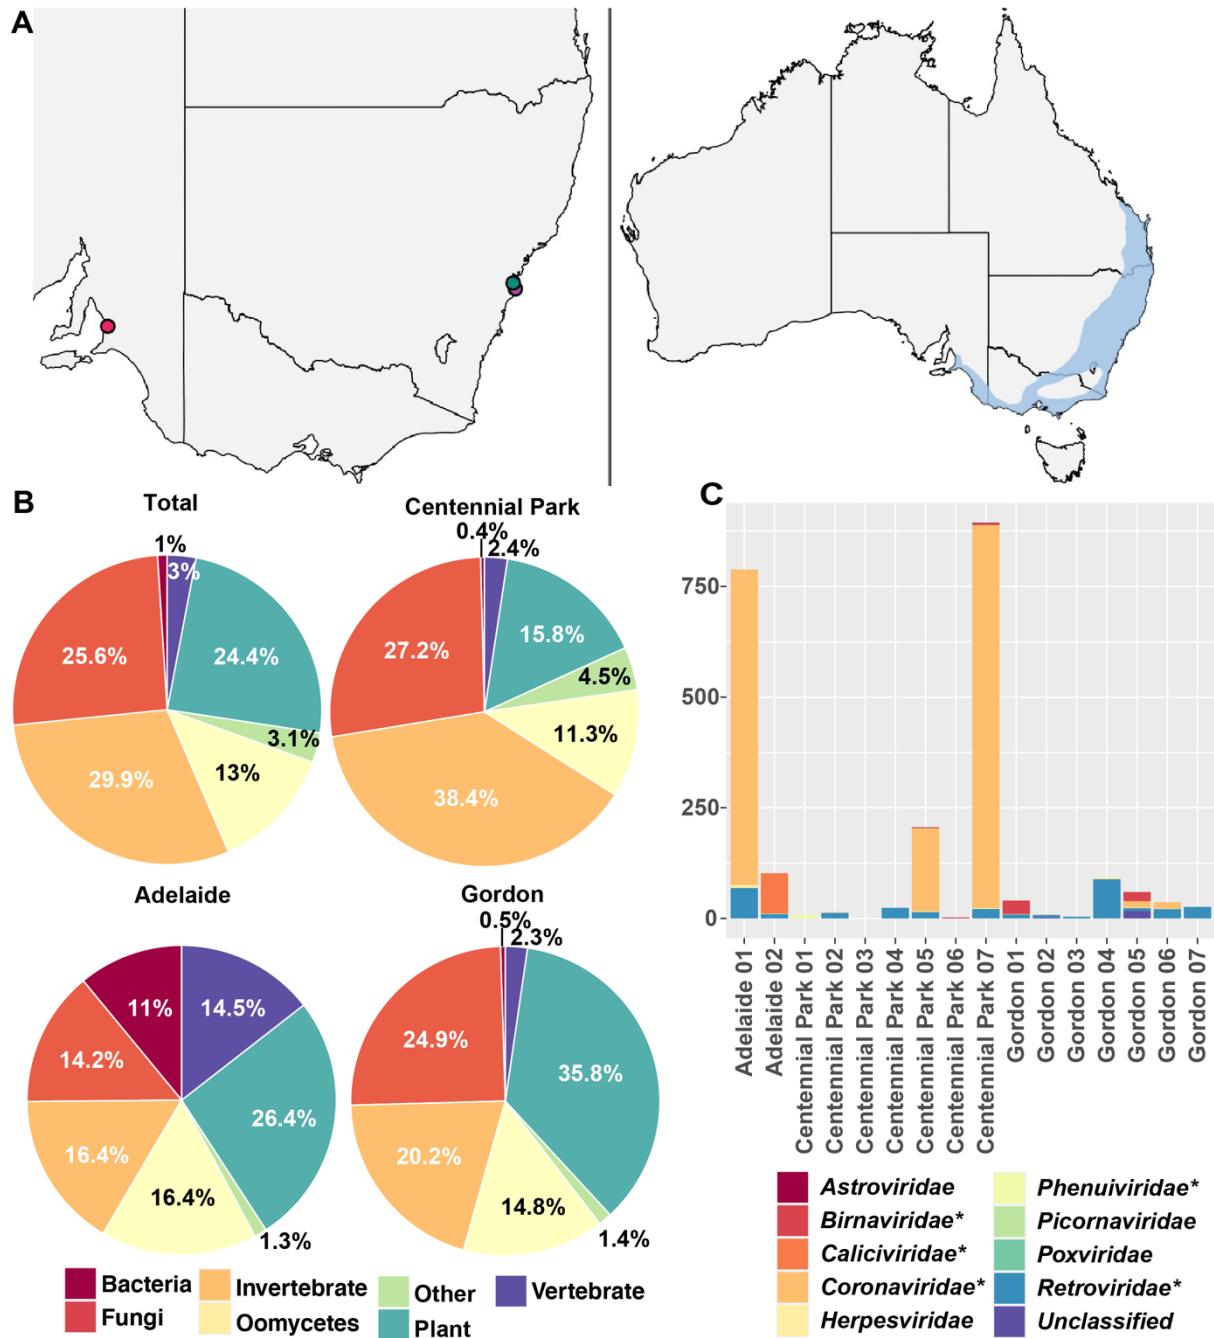

169

170

171 **Fig. 1.** Overview of sampling sites and bat faecal sample composition. (A) Sampling  
 172 locations in Australia (left) and distribution map of the grey-headed flying fox (right) (IUCN,  
 173 2021). (B) Likely hosts of viral contigs based on host designation of the closest relatives in  
 174 the NCBI non-redundant protein database. (C) Read abundance presented as reads per million  
 175 (RPM) for the vertebrate-associated virus sequences for each library and separated by virus  
 176 family. The virus families discussed in this study are highlighted with an asterisk.

177

178 **Mammalian-associated viruses**



179 We detected contigs from nine viral families likely to infect mammals (Fig. 1C). The  
180 *Coronaviridae* and *Retroviridae* were particularly abundant and present in five and 13  
181 libraries, respectively (Fig. 1C). Members of the *Birnaviridae* and *Caliciviridae* were also  
182 abundant in specific libraries (Fig. 1C). The remaining mammalian-associated viral families  
183 were only detected at low abundance and the contigs were not of sufficient length for further  
184 characterisation.

185

#### 186 **Novel betacoronavirus (*Coronaviridae*)**

187 A novel complete betacoronavirus genome (single-strand, positive-sense RNA virus;  
188 +ssRNA) – provisionally denoted bat faecal coronavirus CP07/aus/1 – was identified in a  
189 sequencing library sampled from Centennial Park (pool no. 07) and in a sequencing library  
190 from Adelaide (pool no. 01). These two sequences exhibited 99.8% identity over the  
191 complete viral genome indicating that they represent the same species. Additionally, three  
192 sequences with 99.2-100% sequence identity to CP07/aus/1 were identified in an additional  
193 Centennial Park library (pool no. 05).

194

195 CP07/aus/1 contains ten ORFs in the arrangement ORF1a, ORF1ab, spike, NS3, envelope,  
196 matrix, nucleocapsid, NS7a, NS7b and NS7c. Transcription Regulatory Sequences (TRS)  
197 preceded all ORFs. Additional bat coronavirus contigs ranging from 318 to 1,309 bp were  
198 detected in sequencing libraries from two Gordon sampling locations. These short contigs  
199 shared 40-95% amino acid identity to CP07/aus/1. Three of these contigs contained RdRp or  
200 spike amino acid sequences of sufficient length for phylogenetic analysis, and these were  
201 provisionally denoted bat faecal coronavirus G05/aus/1, G05/aus/2 and G05/aus/3. Based on  
202 phylogenetic analysis of the RNA-dependent RNA polymerase (RdRp) and/or spike protein,  
203 the novel betacoronaviruses detected here fell within the *Betacoronavirus* subgenus  
204 *Nobecovirus* (Fig. 2) and were most closely related to P.alecto/Aus/SEQ/2009 (for which  
205 only a partial RdRp is available) sampled from a black flying fox in south east Queensland,  
206 Australia (Smith et al., 2016) and to *Pteropus rufus nobecovirus* sampled from a flying fox in  
207 Madagascar (accession no. OK067319; Fig. 2) (Kettenburg et al., 2022). CP07/aus/1 had  
208 83% amino acid identity to *Pteropus rufus nobecovirus* over the complete ORF1ab replicase  
209 and 97% to P.alecto/Aus/SEQ/2009 over the partial RdRp. Amino acid identity to *Pteropus*  
210 *rufus nobecovirus* over the spike and non-structural proteins was 72% and 58%, respectively.  
211 The RdRp of G05/aus/1 shared 95% amino acid identity to CP07/aus/1, while the partial  
212 spike proteins of G05/aus/2 and G05/aus/3 shared 57% and 63% amino acid identity to

213 CP07/aus/1, respectively. It is possible that G05/aus/1 and G05/aus/2 represent transcripts  
 214 from the same virus, while G05/aus/3 represents a different species to CP07/aus/1. However,  
 215 this could not be confirmed as the G05/aus/3 genome was incomplete. Regardless, it is clear  
 216 from the spike protein phylogeny that at least three different coronaviruses are circulating in  
 217 the bats sampled here.

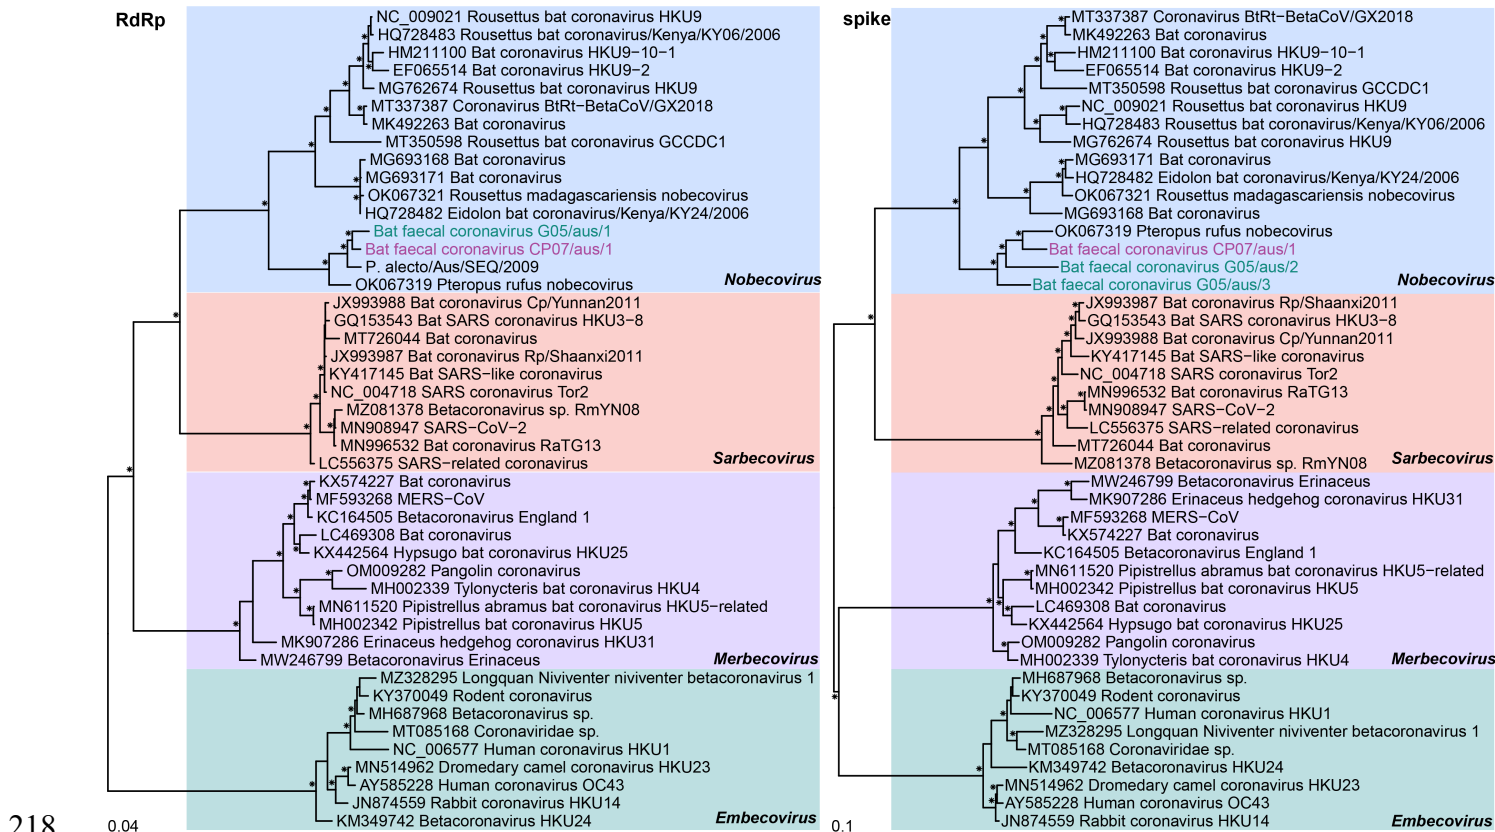

232 were detected in the same sequencing library. The nine sequences shared 66-74% nucleotide  
233 and 76-81% amino acid identity to Ad02/aus/1 over the polyprotein, suggesting the presence  
234 of additional diverse sapoviruses. The near complete Ad02/aus/1 genome is 7,254 bp and  
235 contains two ORFs encoding a polyprotein (near complete with likely 45 residues missing  
236 from the 5' end), and the VP2. Ad02/aus/1 exhibited 44.8% amino acid identity in the partial  
237 polyprotein to its closest relative – Bat sapovirus Bat-SaV/Limbe65/CAM/2014 (accession  
238 no. KX759620) – detected in the faeces of *Eidolon helvum* bats in Cameroon, Africa (Yinda  
239 et al., 2017). Phylogenetic analysis of the RdRp and VP1 revealed a clustering of bat  
240 sapoviruses in both trees that included the novel Australian bat sapoviruses found here (Fig.  
241 3). Bat sapoviruses have been assigned to the putative genogroups GXIV, GXVI, GXVII,  
242 GXVIII and GXIX based on VP1 phylogeny and amino acid sequence identities. Using the  
243 same criteria, the novel sapovirus Ad02/aus/1 identified here should be assigned to its own  
244 genogroup, putatively named GXX, which would also include the partial VP1 Ad02/aus/4  
245 sequence (Supplementary Table 1, Fig. 3).

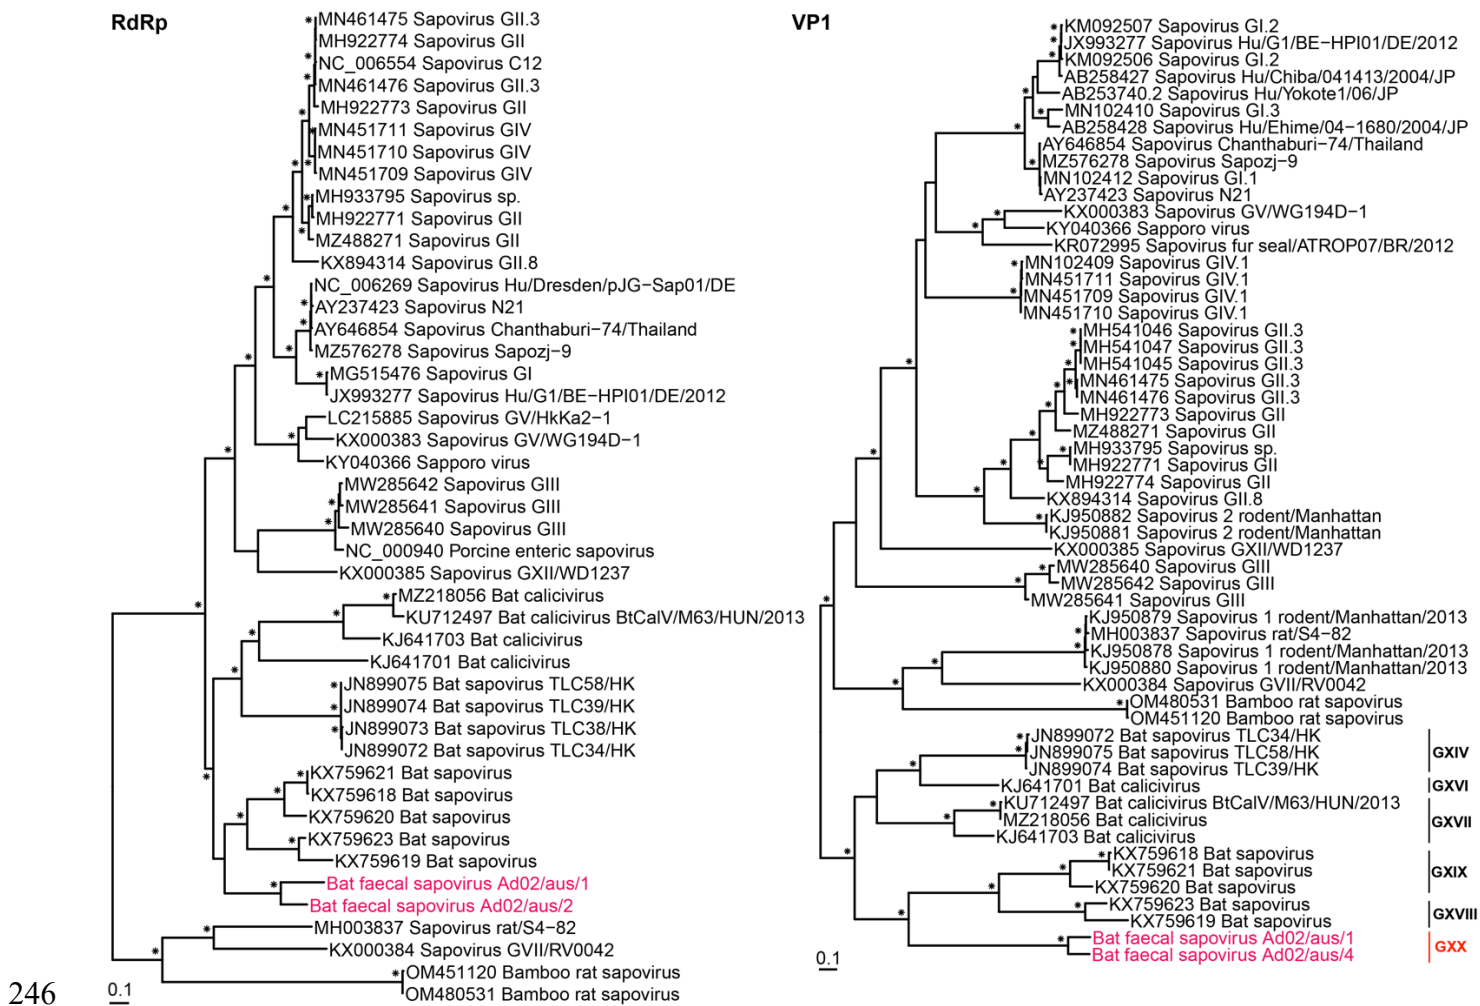

247 **Fig. 3.** Phylogenetic relationships of the novel bat sapoviruses using the amino acid  
248 sequences of the RdRp and VP1. Amino acid alignment lengths were 491 and 623 residues  
249 for the RdRp and VP1, respectively. Bat sapoviruses from this study are coloured by  
250 sampling location (Adelaide – pink) and bootstrap values >70% are represented by the  
251 symbol shown at the branch node. The putative bat sapovirus genogroups are displayed to the  
252 right of the VP1 tree and our proposed putative genogroup is coloured in red. The trees are  
253 rooted at midpoint for clarity and the scale bar represents the amino acid substitutions per  
254 site.

255

### 256 **Novel birna-like virus (*Birnaviridae*)**

257 Sequences related to the *Birnaviridae* (double-stranded RNA viruses; dsRNA) were detected  
258 in one Centennial Park and two Gordon libraries. All the birna-like virus sequences identified  
259 in the Centennial Park and Gordon libraries shared >99% nucleotide identity, and the  
260 complete coding region of segment B, which encodes the RdRp, was obtained from one  
261 library (Gordon 05). The *Birnaviridae* segment A that encodes the polyprotein and a small  
262 overlapping ORF was not identified in our data. Phylogenetic analysis revealed that the birna-  
263 like virus RdRp sequence, denoted G05/aus/1, was most closely related (50% amino acid  
264 identity) to the disease-causing virus Chicken proventricular necrosis virus (Fig. 4) (Guy et  
265 al., 2011), forming a distinct clade that is distantly related to the birnaviruses that infect a  
266 wide range of hosts.

267

### 268 **Bat retrovirus (*Retroviridae*)**

269 A near complete genome of a retrovirus was identified in Gordon library 04 and provisionally  
270 named bat faecal associated retrovirus 1 G04/aus/1. Four ORFs were observed over the 7,455  
271 bp genome and assigned as the gag, pro, pol and env genes based on the presence of  
272 conserved domains. In the pro gene we were able to identify an active site motif DTGAD  
273 predominately observed in functional retroviruses, and a helix motif GRDVL (Turnbull and  
274 Douville, 2018). We were unable to identify complete long terminal repeat (LTR) regions in  
275 the 7,455 bp genome, although this may be due to incomplete assembly at the 5' and/or 3'  
276 end, rather than a true absence of LTRs. Importantly, as the four ORFs contained the  
277 appropriate retrovirus conserved domains and were uninterrupted by stop codons, it is  
278 possible that G04/aus/1 is potentially exogenous and functional. A BLASTn analysis of the  
279 complete G04/aus/1 genome revealed no match to any bat reference genome on  
280 NCBI/GenBank. G04/aus/1 exhibited 56% amino acid identity in the pol protein to its closest

281 relative, Simian retrovirus 2 (accession M16605), a presumably exogenous retrovirus (Thayer  
282 et al., 1987). The abundance for this novel retrovirus in the Gordon 04 library was 67 RPM  
283 (2,457 reads) (Fig. 1C).

284

285 A further near complete retroviral genome was identified by reassembling 31 partial contig  
286 sequences from 12 libraries from all three sample locations. This Bat faecal associated  
287 retrovirus 2 AdCPG/aus/1 is 6,630 bp and contains four open reading frames encoding the  
288 gag, pro, pol and env genes. It also contains the conserved domains expected in functional  
289 retroviruses, although the terminal end of the env gene is missing (either from true truncation  
290 or incomplete assembly). The virus is most closely related to AdCPG/aus/1 sampled from the  
291 lung tissue of Malayan pangolins (Ning et al., 2022). BLASTn analysis of the complete  
292 genome of AdCPG/aus/1 showed the absence of this genome in any bat reference genome on  
293 NCBI/GenBank. AdCPG/aus/1 reads were detected in 13 libraries (two Adelaide, four  
294 Centennial Park and seven Gordon) and the abundance in each library ranged from 3.7 – 68.8  
295 RPM (127 – 1786 reads) (Fig. 1C). Phylogenetic analysis of the pol protein that contains the  
296 reverse transcriptase (RT) domain revealed that G04/aus/1 and AdCPG/aus/1 fell within the  
297 genus *Betaretrovirus*, clustering with both exogenous and endogenous retroviruses associated  
298 with various mammalian species (Fig. 4).

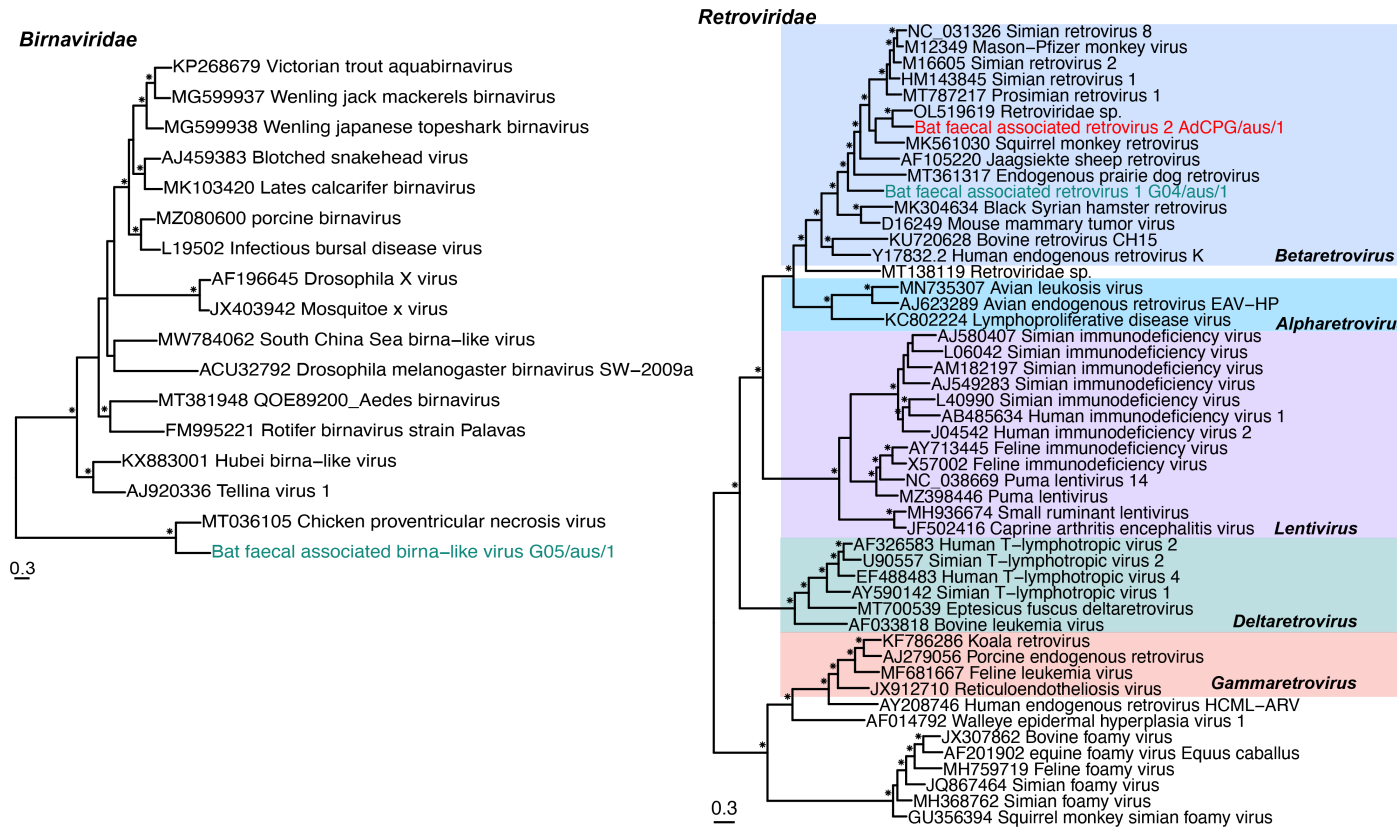

299

300 **Fig. 4.** Phylogenetic analysis of the birna-like virus and bat retroviruses based on the RdRp  
 301 and pol amino acid sequences, respectively. The *Birnaviridae* RdRp sequence alignment was  
 302 767 amino acid residues in length while the *Retroviridae* pol alignment comprised 1,356  
 303 residues. The viruses from this study are coloured by sampling location (Gordon – green) and  
 304 the reassembled retrovirus sequence is in red (to indicate multiple locations). The  
 305 *Retroviridae* genera are highlighted and bootstrap values >70% are represented by the symbol  
 306 shown at the branch node. The tree is midpoint rooted for clarity, with the scale bar  
 307 representing the amino acid substitutions per site.

308

### 309 **Invertebrate-associated viruses**

310 We detected likely invertebrate-associated virus sequences from seven single-strand  
 311 negative-sense RNA viruses (-ssRNA), three +ssRNA virus and one dsRNA virus families, in  
 312 addition to the order *Bunyavirales* (-ssRNA). The virus sequences from the *Chuviridae*,  
 313 *Lispiviridae*, *Artoviridae*, *Nyamiviridae*, *Xinmoviridae*, *Qinviridae*, *Disctroviridae* and  
 314 *Iflaviridae* are not discussed further, although information on positive libraries is provided  
 315 (Supplementary Fig. 1) and phylogenetic analysis was performed (Supplementary Fig. 2).  
 316 Virus sequences from the *Orthomyxoviridae*, *Nodaviridae*, *Reoviridae* and *Bunyavirales* are  
 317 considered further as these viral groups include mammalian-infecting viruses, are important

318 vector-borne viruses, or are able to infect mammals experimentally (*Nodaviridae*, genus  
319 *Alphanodavirus*).

320

321 Orthomyxovirus (-ssRNA virus) segments were identified in five libraries from Centennial  
322 Park. Full coding regions for two polymerase segments – PB2 and PA – and the  
323 hemagglutinin segment 2 and nucleocapsid segment 5 were present in all libraries, although a  
324 full coding region for polymerase segment PB1 was only present in a single Centennial Park  
325 library. The three polymerase proteins of Centennial Park library 06 were used for  
326 phylogenetic analysis, which revealed that this sequence was most closely related to an  
327 orthomyxovirus sampled from jumping plant lice in Australia (Fig. 5) (Käfer et al., 2019).

328 Nodaviruses (+ssRNA virus) were detected in five Centennial Park libraries and three  
329 Gordon libraries. Both the RNA1 (RdRp) and RNA2 segments were identified, including two  
330 sequences with the complete RdRp. Nodavirus CP01/aus/1 and CP02/aus/1 were related to a  
331 nodavirus sampled from birds in China (Zhu et al., 2022) and most likely belong to the same  
332 viral species, although these fragments were only 476 and 232 amino acids, respectively. The  
333 nodavirus CP07/aus/1 RdRp segment was related to a nodavirus from arthropod hosts from  
334 China (Fig. 5) (Shi et al., 2016). Gene segments related to the *Reoviridae* (dsRNA) were  
335 present in all Centennial Park, three Gordon and one Adelaide library. The reovirus VP1 Pol  
336 segments detected here were related, albeit distantly (~40% amino acid identity) to reoviruses  
337 associated with ticks (Harvey et al., 2019, Vanmechelen et al., 2021), moths (Graham et al.,  
338 2006), bat flies (Xu et al., 2022) and the Asian citrus psyllid (Nouri et al., 2015) (Fig. 5).

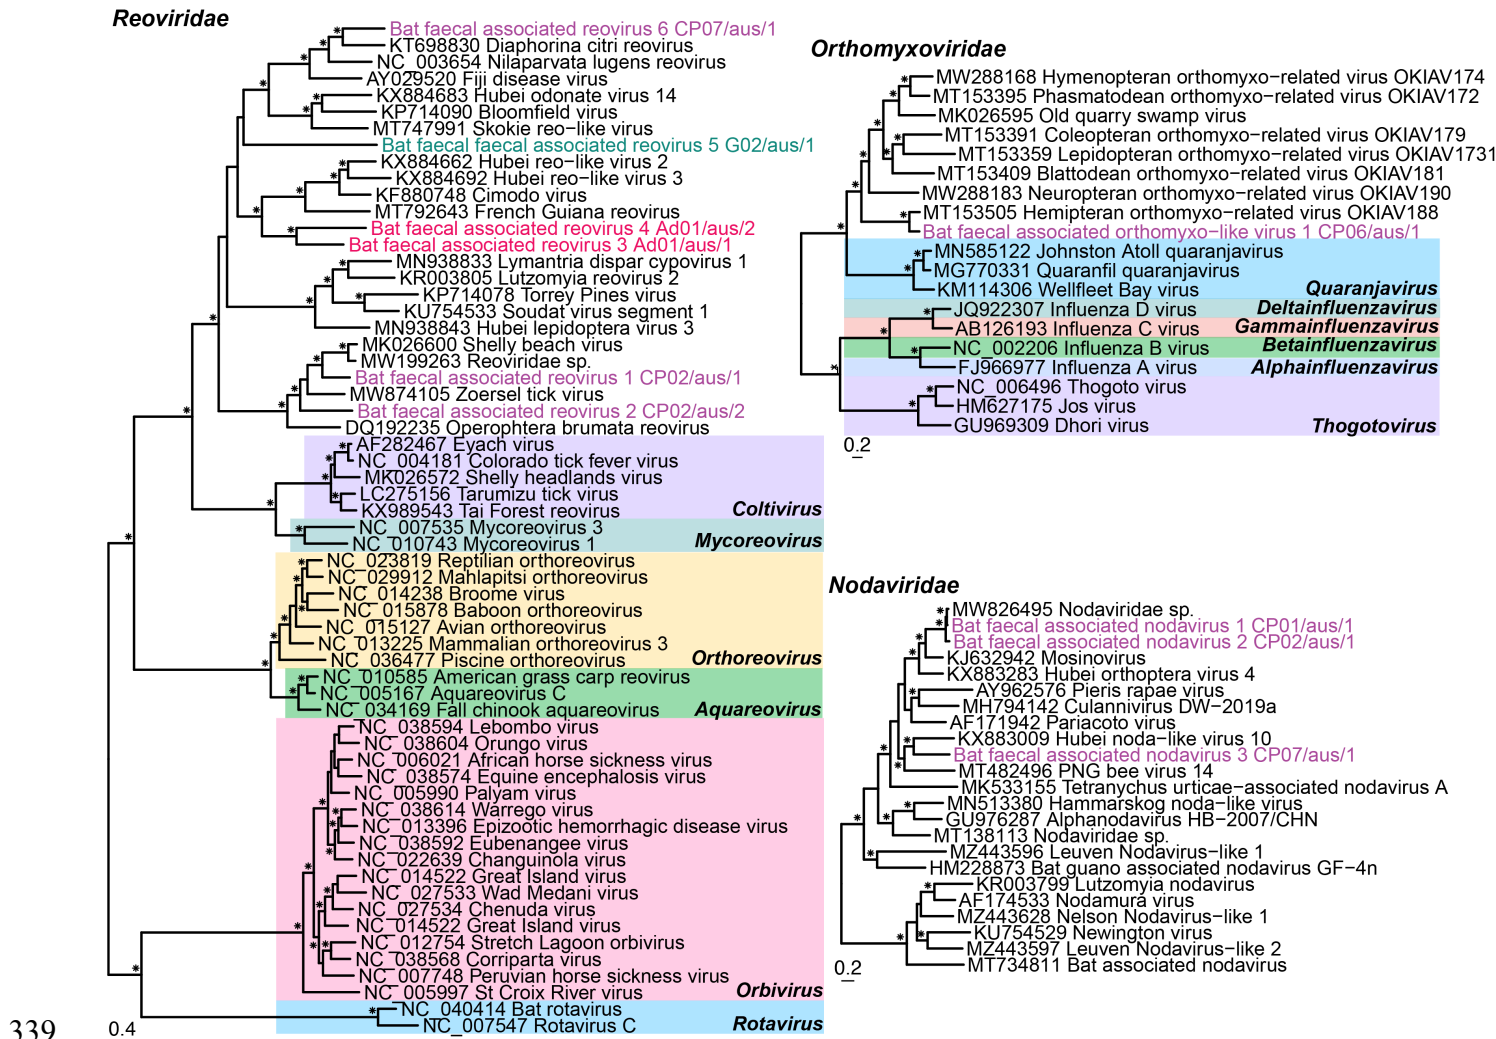

339

340 **Fig. 5.** Phylogenetic analysis of the invertebrate-associated reoviruses, orthomyxoviruses and

341 nodaviruses based on the VP1 Pol, concatenated PB2-PB1-PA and RdRp amino acid

342 sequences, respectively. Amino acid alignment length were 1,020 residues for *Reoviridae*,

343 2,233 residues for the *Orthomyxoviridae* and 774 residues for the *Nodaviridae*. Viruses from

344 this study are coloured by sampling location (Adelaide – pink, Centennial Park – purple and

345 Gordon – green) and genera are highlighted in the *Reoviridae* and *Orthomyxoviridae* trees.

346 Bootstrap values >70% are represented by the symbol shown at the branch node. The tree is

347 rooted at midpoint for clarity and the scale bar represents the amino acid substitutions per

348 site.

349

350 Finally, bunyavirus fragments were detected in all the Adelaide and Centennial Park libraries

351 and six Gordon libraries. Eleven RdRp coding regions were used for phylogenetic analysis

352 which revealed that two bunyavirus sequences fell into the *Phenuiviridae* and four were basal

353 to that family, while two sequences fell into the *Phasmaviridae*, two were basal to the



354 *Arenaviridae*, and one was basal to a grouping of five families (Fig. 6). The Adelaide  
 355 bunyavirus Ad02/aus/1 was related to the plant associated genus *Tenuivirus* and the  
 356 remaining 10 were related to invertebrate hosts (Fig. 6).

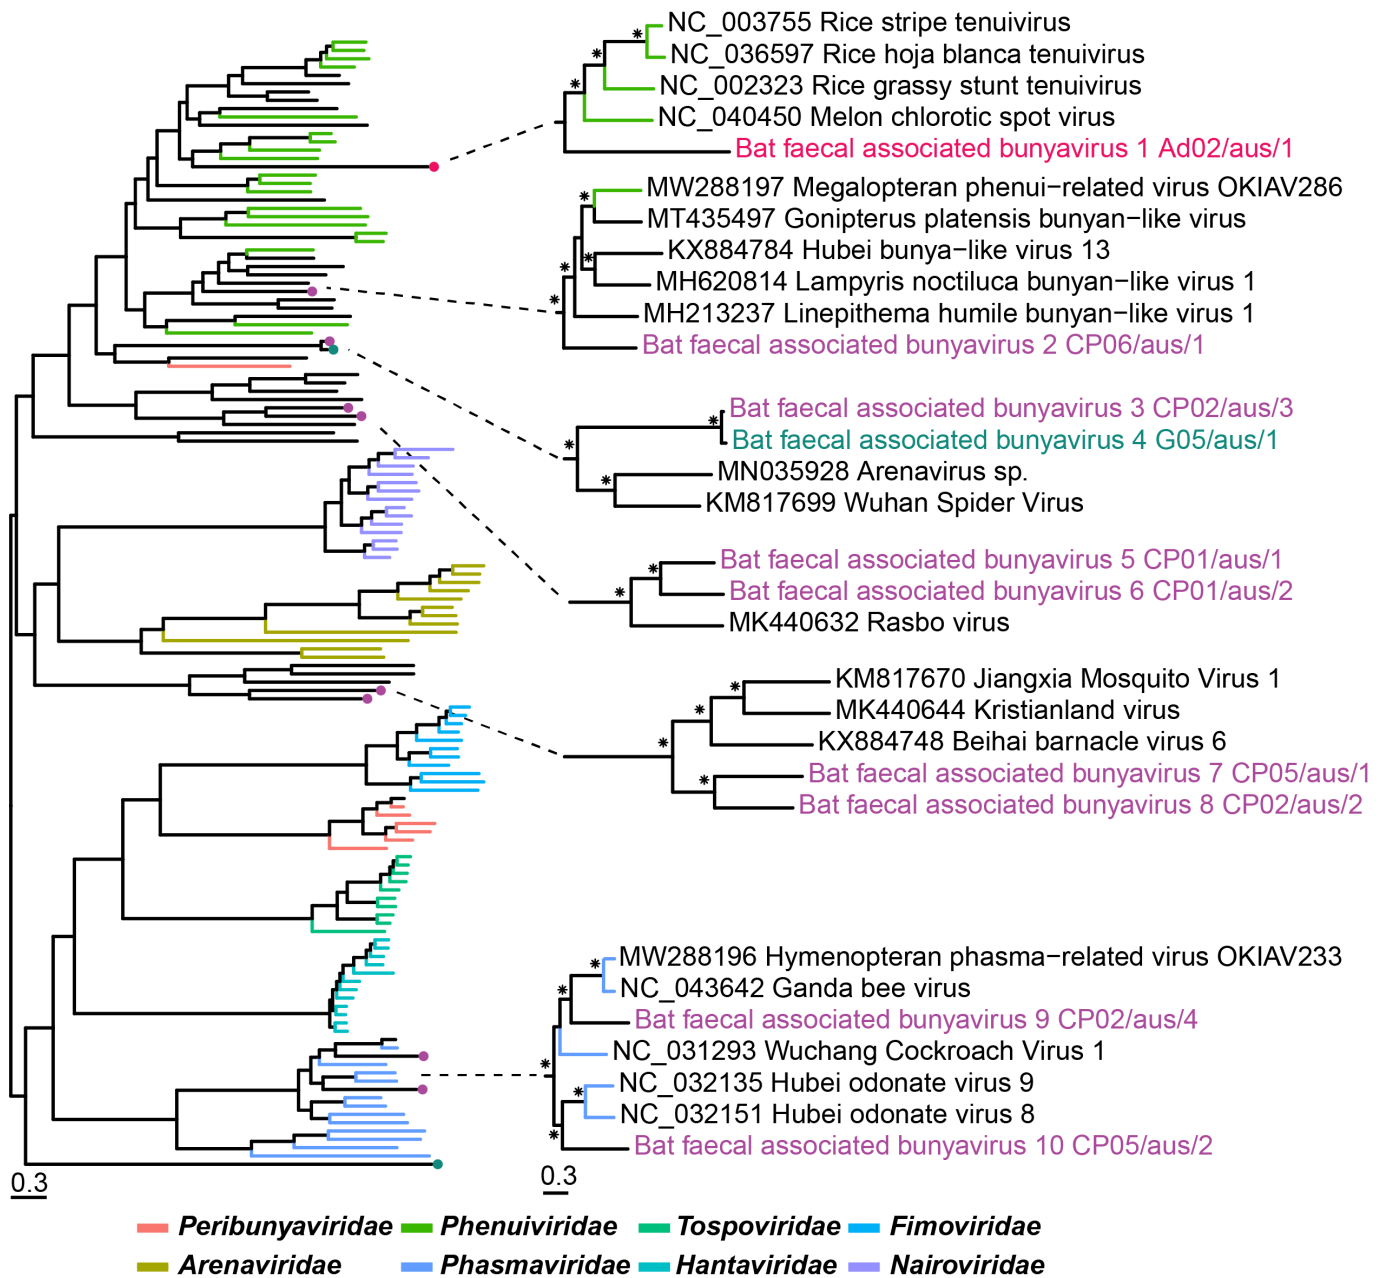

357  
 358 **Fig. 6.** Phylogenetic analysis of viruses from the order *Bunyvirales*. The RdRp amino acid  
 359 sequence was used to estimate phylogenetic trees and the alignment length was 1,434 amino  
 360 acid residues. Viruses from this study are coloured by sampling location and bootstrap values  
 361 >70% are represented by the symbol shown at the branch node. The tree is midpoint rooted  
 362 for clarity and the scale bar represents the amino acid substitutions per site.

363

#### 364 4. Discussion

365 Virological surveillance of bats in Australia has largely focused on screening for known  
366 zoonotic viruses such as Hendra virus and Australian bat lyssavirus, although the  
367 paramyxovirus Tioman virus, for which flying foxes are the natural host, and coronaviruses  
368 are also targeted (Boardman et al., 2020, Prada et al., 2019a, Smith et al., 2016). The primary  
369 aim of these studies is to identify specific viruses using either PCR or serological data.  
370 Although such surveillance has been successful in determining the active circulation of these  
371 specific viruses, these approaches necessarily have restricted capacity to detect novel or  
372 unexpected viruses, thus providing a limited understanding of viruses circulating in  
373 Australian bats. As bats are frequently found near human populations, they are of particular  
374 concern regarding potential zoonoses (Plowright et al., 2011, Williams et al., 2006, Halpin et  
375 al., 2000). Herein, we used metatranscriptomics to reveal the natural faecal virome of the  
376 grey-headed flying fox. Although most of the viruses identified were likely associated with  
377 bat diet, as expected from faecal sampling, we also identified viruses from three mammalian-  
378 associated families (*Coronaviridae*, *Caliciviridae*, *Retroviridae*) and one virus from the  
379 *Birnaviridae* family that may also have a mammalian association.

380

381 Both alpha- and betacoronaviruses have been identified in a variety of bat species (Smith et  
382 al., 2016, Prada et al., 2019b). Here, we characterised the complete genome of a  
383 betacoronavirus in grey-headed flying foxes that was closely related to two other  
384 betacoronaviruses sampled in flying foxes in Australia and Madagascar (Smith et al., 2016,  
385 Kettenburg et al., 2022). The current ICTV classification for coronavirus species states that  
386 less than 90% amino acid identity in the ORF1ab conserved replicase domains constitutes a  
387 new species. Although bat faecal coronavirus CP07/aus/1 shares high sequence similarity to  
388 another reported bat betacoronavirus, the P.alecto/Aus/SEQ/2009 sequence is only 146 amino  
389 acids in length, does not span the complete RdRp and is therefore difficult to classify.  
390 Accordingly, we suggest that betacoronavirus bat faecal coronavirus CP07/aus/1 represents a  
391 novel species, to which P.alecto/Aus/SEQ/2009 may also belong. The complete genome of  
392 this virus was found in both Adelaide and New South Wales (99.8% nucleotide similarity  
393 between the two genomes) and abundance counts were high in both locations (Fig. 1C),  
394 indicative of virus exchange between bat populations. Flying foxes are known to travel long  
395 distances to feed, roosting sites change depending on season, and in Australia several flying  
396 fox species share roosting sites (Timmiss et al., 2021), all of which provide opportunities for  
397 viruses to infect new individuals. Importantly, while we were only able to assemble the  
398 complete genome of one novel coronavirus, we identified partial genome fragments of at

399 least two more diverse coronaviruses (Fig. 2), indicating that Australian bats carry a high  
400 diversity of coronaviruses as has been seen in other bat species.

401

402 This is the first report of a sapovirus in Australian bats. Previously, bat sapoviruses have been  
403 sampled from *Eidolon helvum* (Straw-coloured fruit bat) in Cameroon (Yinda et al., 2017)  
404 and Saudi Arabia (Mishra et al., 2019) and *Hipposideros Pomona* (Pomona leaf-nosed bat)  
405 from Hong Kong (Tse et al., 2012). Currently, the bat sapoviruses characterised have been  
406 from bats with no apparent disease (Tse et al., 2012, Yinda et al., 2017, Mishra et al., 2019).  
407 Whether this is the case here is unknown because the reliance on faecal sampling meant that  
408 there was no direct interaction with individual animals. The disease potential of bat  
409 sapoviruses should be investigated further as sapoviruses have been linked to acute  
410 gastroenteritis outbreaks in humans (Oka et al., 2015) and some animal sapoviruses are  
411 closely related to those found in humans (Mombo et al., 2014, Firth et al., 2014, Martella et  
412 al., 2008).

413

414 Until the metagenomic detection of porcine birnavirus (Yang et al., 2021) and porcupine  
415 birnavirus (He et al., 2022) it was believed the *Birnaviridae* infected fish, insects and birds  
416 exclusively (Crane et al., 2000, Da Costa et al., 2003, Chung et al., 1996, Brown and Skinner,  
417 1996, Guy et al., 2011). We identified the segment B sequence of a novel bat faecal  
418 associated birna-like virus that was most closely related to a divergent pathogenic avian  
419 birnavirus (50% amino acid identity). Given its divergent phylogenetic position it is currently  
420 unclear whether this virus actively infects grey-headed flying foxes or is associated with a  
421 component of their diet or microbiome. While grey-headed flying foxes are not insectivores,  
422 the ingestion of insects through the consumption of fruit and nectar seems likely given the  
423 high number of invertebrate, plant and fungi viruses sequenced here (Fig. 1B, Supplementary  
424 Fig. 1). The moderate abundance values (30.5 and 19.9 RPM) cannot exclude either scenario  
425 as using a host reference gene such as COX1 for sequencing depth comparison may not be as  
426 reliable for faecal samples as it would be when analysing tissue. Further investigation is  
427 needed to determine the natural host of bat faecal associated birna-like virus and to determine  
428 what tissue types are affected.

429

430 Two intact, possibly exogenous retrovirus near complete genomes were also identified in this  
431 study and were most closely related to mammalian infecting retroviruses from the genus  
432 *Betaretrovirus*. Six retroviruses have been previously characterised from Australian bat brain

433 tissue and excretions (including faeces), all from the genus *Gammaretrovirus* (Hayward et  
434 al., 2020, Cui et al., 2012) and hence highly divergent from the viruses identified here.  
435 Although the exogenous status needs to be confirmed, it is possible that bat faecal associated  
436 retrovirus 1 G04/aus/1 and bat faecal associated retrovirus 2 AdCPG/aus/1 constitute the first  
437 exogenous and intact betaretroviruses sampled from the faeces of bats in Australia.  
438 Unfortunately, virus identification through metatranscriptomics does not provide reliable  
439 information on whether a virus is endogenous and defective, or still functional and exogenous  
440 (Hayward et al., 2013, Hayward and Tachedjian, 2021). That the retroviruses detected here  
441 have all the necessary genes to comprise a functional virus, with undisrupted ORFs, were not  
442 detected in every library, and are not present in the bat genome, at the very least suggests that  
443 they are only recently endogenized and currently unfixated in the bat population. Further work  
444 confirming the nature of the retroviruses detected here is warranted since bats are known to  
445 be major hosts for retroviruses (Cui et al., 2015) and their cross-species transmission across  
446 mammalian orders is commonplace (Hayward et al., 2013).

447

448 In addition to mammalian viruses, we detected virus sequences that are likely invertebrate-  
449 associated. Of particular interest were those from the *Orthomyxoviridae* and *Reoviridae* that  
450 span a wide variety of hosts including mammals and were at high abundance in some of the  
451 Centennial Park libraries. Notably, bat faecal associated reovirus 1 CP02/aus/1 groups with  
452 members of the *Reoviridae* associated with ticks that are vectors for numerous pathogenic  
453 microorganisms, particularly from the genus *Coltivirus* – Colorado tick fever virus and Eyach  
454 virus (Goodpasture et al., 1978, Rehse-Küpper et al., 1976). Additionally, a novel coltivirus –  
455 Tai Forest reovirus – was sampled from bats in Cote d’Ivoire and shown to infect human cells  
456 (Weiss et al., 2017). The current evidence for tick-borne reovirus infection in humans  
457 highlights the importance of assessing the pathogenic potential of new tick associated  
458 reoviruses, especially those viruses discovered in urban wildlife.

459

460 Our study highlights the diversity of viruses in wildlife species from metropolitan areas. In  
461 this context it is notable that the bat coronaviruses identified fall within the subgenus  
462 *Nobecovirus* of betacoronaviruses. Currently, this subgenus is strongly associated with bats  
463 sampled on multiple continents, with the phylogenetic depth of the *Nobecovirus* lineage  
464 further suggesting that bats have harbored these viruses for millennia with no apparent  
465 infection of humans. Hence, although the bats studied were resident in urban/suburban  
466 locations, this does not necessarily translate into a clear risk of human emergence.

467

## 468 **Data statement**

469 The raw data generated for this study are available in the NCBI SRA database under the  
470 BioProject accession number PRJNA851532 and SRA accession numbers SRR19790899-  
471 SRR19790914. All genome sequences presented in phylogenetic trees are available in NCBI  
472 GenBank under the accession numbers ON872523-ON872588.

473

## 474 **Declaration of interests**

475 The authors declare that they have no known competing financial interests or personal  
476 relationships that could have appeared to influence the work reported in this paper.

477

## 478 **Acknowledgements**

479

## 480 **Ethics statement**

481 Ethics approval was granted by the University of Sydney Animal Ethics Committee (AEC  
482 2018/1460).

483

## 484 **Funding source**

485 The work was funded by an Australian Research Council Australian Laureate Fellowship to  
486 ECH (FL170100022) and the Sydney Institute for Infectious Diseases.

487

## 488 **CRedit authorship contribution statement**

489 **Kate Van Brussel:** Investigation, Data curation, Formal analysis, Writing – original draft,  
490 Writing – preparation, review and editing. **Jackie E. Mahar:** Formal analysis, Writing –  
491 preparation, review and editing. **Ayda Susana Ortiz-Baez:** Formal analysis, Writing –  
492 preparation, review and editing. **Maura Carrai:** Investigation, Writing – review. **Derek**  
493 **Spielman:** Investigation. **Wayne S. J Boardman:** Investigation, Writing – review. **Michelle**  
494 **L. Baker:** Resources, Writing – review. **Julia A. Beatty:** Investigation, Supervision. **Jemma**  
495 **L. Geoghegan:** Resources, Writing – review. **Vanessa R. Barrs:** Conceptualisation,  
496 Methodology, Funding acquisition, Supervision, Writing – review and editing. **Edward C.**  
497 **Holmes:** Conceptualisation, Funding acquisition, Supervision, Writing – preparation, review  
498 and editing.

499

## 500 **References**

- 501 Besemer, J., Borodovsky, M. 1999. Heuristic approach to deriving models for gene finding.  
502 *Nucleic Acids Res.* 27, 3911-3920.
- 503 Boardman, W.S.J., Baker, M.L., Boyd, V., Crameri, G., Peck, G.R., Reardon, T., Smith, I.G.,  
504 Caraguel, C.G.B., Prowse, T.A.A. 2020. Seroprevalence of three paramyxoviruses;  
505 Hendra virus, Tioman virus, Cedar virus and a rhabdovirus, Australian bat lyssavirus, in  
506 a range expanding fruit bat, the Grey-headed flying fox (*Pteropus poliocephalus*). *PLoS*  
507 *One* 15, e0232339.
- 508 Botvinkin, A.D., Poleschuk, E.M., Kuzmin, I.V., Borisova, T.I., Gazaryan, S.V., Yager, P.,  
509 Rupprecht, C.E. 2003. Novel lyssaviruses isolated from bats in Russia. *Emerg. Infect.*  
510 *Dis.* 9, 1623-1625.
- 511 Brown, M.D., Skinner, M.A. 1996. Coding sequences of both genome segments of a  
512 European 'very virulent' infectious bursal disease virus. *Virus Res.* 40, 1-15.
- 513 Capella-Gutiérrez, S., Silla-Martínez, J.M., Gabaldón, T. 2009. trimAl: a tool for automated  
514 alignment trimming in large-scale phylogenetic analyses. *Bioinformatics* 25, 1972-1973.
- 515 Chung, H.K., Kordyban, S., Cameron, L., Dobos, P. 1996. Sequence analysis of the  
516 bicistronic *Drosophila* X virus genome segment A and its encoded polypeptides.  
517 *Virology* 225, 359-368.
- 518 Crane, M.S., Hardy-Smith, P., Williams, L.M., Hyatt, A.D., Eaton, L.M., Gould, A.,  
519 Handler, J., Kattenbelt, J., Gudkovs, N. 2000. First isolation of an aquatic birnavirus  
520 from farmed and wild fish species in Australia. *Dis. Aquat. Organ.* 43, 1-14.
- 521 Cui, J., Tachedjian, G., Wang, L.F. 2015. Bats and rodents shape mammalian retroviral  
522 phylogeny. *Sci. Rep.* 5, 16561.
- 523 Cui, J., Tachedjian, M., Wang, L., Tachedjian, G., Wang, L.F., Zhang, S. 2012. Discovery of  
524 retroviral homologs in bats: implications for the origin of mammalian  
525 gammaretroviruses. *J. Virol.* 86, 4288-4293.
- 526 Da Costa, B., Soignier, S., Chevalier, C., Henry, C., Thory, C., Huet, J.C., Delmas, B. 2003.  
527 Blotched snakehead virus is a new aquatic birnavirus that is slightly more related to  
528 avibirnavirus than to aquabirnavirus. *J. Virol.* 77, 719-725.
- 529 Firth, C., Bhat, M., Firth, M.A., Williams, S.H., Frye, M.J., Simmonds, P., Conte, J.M., Ng,  
530 J., Garcia, J., Bhuvu, N.P., Lee, B., Che, X., Quan, P.L., Lipkin, W.I. 2014. Detection of  
531 zoonotic pathogens and characterization of novel viruses carried by commensal *Rattus*  
532 *norvegicus* in New York City. *mBio* 5, e01933-14.

- 533 Goodpasture, H.C., Poland, J.D., Francly, D.B., Bowen, G.S., Horn, K.A. 1978. Colorado tick  
534 fever: clinical, epidemiologic, and laboratory aspects of 228 cases in Colorado in 1973-  
535 1974. *Ann. Intern. Med.* 88, 303-310.
- 536 Gould, A.R., Hyatt, A.D., Lunt, R., Kattenbelt, J.A., Hengstberger, S., Blacksell, S.D. 1998.  
537 Characterisation of a novel lyssavirus isolated from Pteropid bats in Australia. *Virus Res.*  
538 54, 165-187.
- 539 Graham, R.I., Rao, S., Possee, R.D., Sait, S.M., Mertens, P.P., Hails, R.S. 2006. Detection  
540 and characterisation of three novel species of reovirus (*Reoviridae*), isolated from  
541 geographically separate populations of the winter moth *Operophtera brumata*  
542 (Lepidoptera: Geometridae) on Orkney. *J. Invertebr. Pathol.* 91, 79-87.
- 543 Guy, J.S., West, A.M., Fuller, F.J. 2011. Physical and genomic characteristics identify  
544 chicken proventricular necrosis virus (R11/3 virus) as a novel birnavirus. *Avian Dis.* 55,  
545 2-7.
- 546 Halpin, K., Young, P.L., Field, H.E., Mackenzie, J.S. 2000. Isolation of Hendra virus from  
547 pteropid bats: a natural reservoir of Hendra virus. *J. Gen. Virol.* 81, 1927-1932.
- 548 Hardmeier, I., Aeberhard, N., Qi, W., Schoenbaechler, K., Kraettli, H., Hatt, J.M., Fraefel, C.,  
549 Kubacki, J. 2021. Metagenomic analysis of fecal and tissue samples from 18 endemic bat  
550 species in Switzerland revealed a diverse virus composition including potentially  
551 zoonotic viruses. *PLoS One* 16, e0252534.
- 552 Harvey, E., Rose, K., Eden, J.-S., Lo, N., Abeyasuriya, T., Shi, M., Doggett, S.L., Holmes,  
553 E.C. 2019. Extensive diversity of RNA viruses in Australian ticks. *J. Virol.* 93, e01358-  
554 18.
- 555 Hayward, A., Grabherr, M., Jern, P. 2013. Broad-scale phylogenomics provides insights into  
556 retrovirus-host evolution. *Proc Natl Acad Sci USA* 110, 20146-20151.
- 557 Hayward, J.A., Tachedjian, G. 2021. Retroviruses of bats: a threat waiting in the wings?  
558 *mBio* 12, e0194121.
- 559 Hayward, J.A., Tachedjian, M., Kohl, C., Johnson, A., Dearnley, M., Jesaveluk, B., Langer,  
560 C., Solymosi, P.D., Hille, G., Nitsche, A., Sánchez, C.A., Werner, A., Kontos, D.,  
561 Cramer, G., Marsh, G.A., Baker, M.L., Pountourios, P., Drummer, H.E., Holmes, E.C.,  
562 Wang, L.F., Smith, I., Tachedjian, G. 2020. Infectious KoRV-related retroviruses  
563 circulating in Australian bats. *Proc Natl Acad Sci USA* 117, 9529-9536.
- 564 He, W.T., Hou, X., Zhao, J., Sun, J., He, H., Si, W., Wang, J., Jiang, Z., Yan, Z., Xing, G.,  
565 Lu, M., Suchard, M.A., Ji, X., Gong, W., He, B., Li, J., Lemey, P., Guo, D., Tu, C.,

- 566 Holmes, E.C., Shi, M., Su, S. 2022. Virome characterization of game animals in China  
567 reveals a spectrum of emerging pathogens. *Cell* 185, 1117-1129.e8.
- 568 Hoang, D.T., Chernomor, O., von Haeseler, A., Minh, B.Q., Vinh, L.S. 2017. UFBoot2:  
569 improving the ultrafast bootstrap approximation. *Mol. Biol. Evol.* 35, 518-522.
- 570 International Union for Conservation of Nature. 2021. Data from “*Pteropus poliocephalus*”.  
571 The IUCN Red List of Threatened Species, 2021-3.  
572 <https://www.iucnredlist.org/species/18751/22085511>
- 573 Käfer, S., Paraskevopoulou, S., Zirkel, F., Wieseke, N., Donath, A., Petersen, M., Jones,  
574 T.C., Liu, S., Zhou, X., Middendorf, M., Junglen, S., Misof, B., Drosten, C. 2019.  
575 Reassessing the diversity of negative strand RNA viruses in insects. *PLoS Pathog.* 15,  
576 e1008224.
- 577 Kalyaanamoorthy, S., Minh, B.Q., Wong, T.K.F., von Haeseler, A., Jermin, L.S. 2017.  
578 ModelFinder: fast model selection for accurate phylogenetic estimates. *Nat. Meth.* 14,  
579 587-589.
- 580 Katoh, K., Kuma, K., Toh, H., Miyata, T. 2005. MAFFT version 5: improvement in accuracy  
581 of multiple sequence alignment. *Nucleic Acids Res.* 33, 511-518.
- 582 Katoh, K., Standley, D.M. 2013. MAFFT multiple sequence alignment software version 7:  
583 improvements in performance and usability. *Mol. Biol. Evol.* 30, 772-780.
- 584 Kechin, A., Boyarskikh, U., Kel, A., Filipenko, M. 2017. cutPrimers: a new tool for accurate  
585 cutting of primers from reads of targeted next generation sequencing. *J. Comput. Biol.*  
586 24, 1138-1143.
- 587 Kettenburg, G., Kistler, A., Ranaivoson, H.C., Ahyong, V., Andrianiaina, A., Andry, S.,  
588 DeRisi, J.L., Gentles, A., Raharinosy, V., Randriambolamanantsoa, T.H.,  
589 Ravelomanantsoa, N.A.F., Tato, C.M., Dussart, P., Heraud, J.M., Brook, C.E. 2022. Full  
590 genome *Nobecovirus* sequences from Malagasy fruit bats define a unique evolutionary  
591 history for this coronavirus clade. *Front Public Health* 10, 786060.
- 592 Kopylova, E., Noé, L., Touzet, H. 2012. SortMeRNA: fast and accurate filtering of ribosomal  
593 RNAs in metatranscriptomic data. *Bioinformatics* 28, 3211-3217.
- 594 Langmead, B., Salzberg, S.L. 2012. Fast gapped-read alignment with Bowtie 2. *Nat. Meth.* 9,  
595 357-359.
- 596 Li, D., Liu, C.M., Luo, R., Sadakane, K., Lam, T.W. 2015. MEGAHIT: an ultra-fast single-  
597 node solution for large and complex metagenomics assembly via succinct de Bruijn  
598 graph. *Bioinformatics* 31, 1674-1646.



- 599 Li, W., Shi, Z., Yu, M., Ren, W., Smith, C., Epstein, J.H., Wang, H., Crameri, G., Hu, Z.,  
600 Zhang, H., Zhang, J., McEachern, J., Field, H., Daszak, P., Eaton, B.T., Zhang, S.,  
601 Wang, L.F. 2005. Bats are natural reservoirs of SARS-like coronaviruses. *Science* 310,  
602 676-679.
- 603 Marsh, G.A., de Jong, C., Barr, J.A., Tachedjian, M., Smith, C., Middleton, D., Yu, M.,  
604 Todd, S., Foord, A.J., Haring, V., Payne, J., Robinson, R., Broz, I., Crameri, G., Field,  
605 H.E., Wang, L.F. 2012. Cedar virus: a novel Henipavirus isolated from Australian bats.  
606 *PLoS Pathog.* 8, e1002836.
- 607 Martella, V., Lorusso, E., Banyai, K., Decaro, N., Corrente, M., Elia, G., Cavalli, A.,  
608 Radogna, A., Costantini, V., Saif, L.J., Lavazza, A., Di Trani, L., Buonavoglia, C. 2008.  
609 Identification of a porcine calicivirus related genetically to human sapoviruses. *J. Clin.*  
610 *Microbiol.* 46, 1907-1913.
- 611 Mishra, N., Fagbo, S.F., Alagaili, A.N., Nitido, A., Williams, S.H., Ng, J., Lee, B.,  
612 Durosinlorun, A., Garcia, J.A., Jain, K., Kapoor, V., Epstein, J.H., Briese, T., Memish,  
613 Z.A., Olival, K.J., Lipkin, W.I. 2019. A viral metagenomic survey identifies known and  
614 novel mammalian viruses in bats from Saudi Arabia. *PLoS One* 14, e0214227.
- 615 Mombo, I.M., Berthet, N., Bouchier, C., Fair, J.N., Schneider, B.S., Renaud, F., Leroy, E.M.,  
616 Rougeron, V. 2014. Characterization of a genogroup I sapovirus isolated from  
617 chimpanzees in the Republic of Congo. *Genome Announc.* 2, e00680-14..
- 618 Murakami, S., Kitamura, T., Suzuki, J., Sato, R., Aoi, T., Fujii, M., Matsugo, H., Kamiki, H.,  
619 Ishida, H., Takenaka-Uema, A., Shimojima, M., Horimoto, T. 2020. Detection and  
620 characterization of bat sarbecovirus phylogenetically related to SARS-CoV-2, Japan.  
621 *Emerg. Infect. Dis.* 26, 3025-3029.
- 622 Nguyen, L.-T., Schmidt, H.A., von Haeseler, A., Minh, B.Q. 2014. IQ-TREE: A fast and  
623 effective stochastic algorithm for estimating maximum-likelihood phylogenies. *Mol.*  
624 *Biol. Evol.* 32, 268-274.
- 625 Ning, S., Dai, Z., Zhao, C., Feng, Z., Jin, K., Yang, S., Shen, Q., Wang, X., Sun, R., Zhang,  
626 W. 2022. Novel putative pathogenic viruses identified in pangolins by mining  
627 metagenomic data. *J. Med. Virol.* 94, 2500-2509.
- 628 Nouri, S., Salem, N., Nigg, J.C., Falk, B.W. 2015. Diverse array of new viral sequences  
629 identified in worldwide populations of the Asian citrus psyllid (*Diaphorina citri*) using  
630 viral metagenomics. *J. Virol.* 90, 2434-4245.
- 631 Oka, T., Wang, Q., Katayama, K., Saif, L.J. 2015. Comprehensive review of human  
632 sapoviruses. *Clin. Microbiol. Rev.* 28, 32-53.

- 633 Philbey, A.W., Kirkland, P.D., Ross, A.D., Davis, R.J., Gleeson, A.B., Love, R.J., Daniels,  
634 P.W., Gould, A.R., Hyatt, A.D. 1998. An apparently new virus (family  
635 *Paramyxoviridae*) infectious for pigs, humans, and fruit bats. *Emerg. Infect. Dis.* 4, 269-  
636 271.
- 637 Plowright, R.K., Foley, P., Field, H.E., Dobson, A.P., Foley, J.E., Eby, P., Daszak, P. 2011.  
638 Urban habituation, ecological connectivity and epidemic dampening: the emergence of  
639 Hendra virus from flying foxes (*Pteropus* spp.). *Proc Biol Sci.* 278, 3703-3712.
- 640 Prada, D., Boyd, V., Baker, M., Jackson, B., O'Dea, M. 2019a. Insights into Australian bat  
641 lyssavirus in insectivorous bats of Western Australia. *Trop. Med. Infect. Dis.* 4, 46.
- 642 Prada, D., Boyd, V., Baker, M.L., O'Dea, M., Jackson, B. 2019b. Viral diversity of microbats  
643 within the south west botanical province of Western Australia. *Viruses* 11, 1157.
- 644 Rehse-Küpper, B., Casals, J., Rehse, E., Ackermann, R. 1976. Eyach-an arthropod-borne  
645 virus related to Colorado tick fever virus in the Federal Republic of Germany. *Acta*  
646 *Virol.* 20, 339-342.
- 647 Shi, M., Lin, X.D., Tian, J.H., Chen, L.J., Chen, X., Li, C.X., Qin, X.C., Li, J., Cao, J.P.,  
648 Eden, J.S., Buchmann, J., Wang, W., Xu, J., Holmes, E.C., Zhang, Y.Z. 2016.  
649 Redefining the invertebrate RNA virosphere. *Nature* 540, 539-543.
- 650 Smith, C.S., de Jong, C.E., Meers, J., Henning, J., Wang, L., Field, H.E. 2016. Coronavirus  
651 infection and diversity in bats in the Australasian region. *Ecohealth* 13, 72-82.
- 652 Temmam, S., Vongphayloth, K., Baquero, E., Munier, S., Bonomi, M., Regnault, B.,  
653 Douangboubpha, B., Karami, Y., Chrétien, D., Sanamxay, D., Xayaphet, V.,  
654 Paphaphanh, P., Lacoste, V., Somlor, S., Lakeomany, K., Phommavanh, N., Pérot, P.,  
655 Dehan, O., Amara, F., Donati, F., Bigot, T., Nilges, M., Rey, F.A., van der Werf, S.,  
656 Brey, P.T., Eloit, M. 2022. Bat coronaviruses related to SARS-CoV-2 and infectious for  
657 human cells. *Nature* 604, 330-336.
- 658 Thayer, R.M., Power, M.D., Bryant, M.L., Gardner, M.B., Barr, P.J., Luciw, P.A. 1987.  
659 Sequence relationships of type D retroviruses which cause simian acquired  
660 immunodeficiency syndrome. *Virology*, 157, 317-329.
- 661 Timmiss, L.A., Martin, J.M., Murray, N.J., Welbergen, J.A., Westcott, D., McKeown, A.,  
662 Kingsford, R.T. 2021. Threatened but not conserved: flying-fox roosting and foraging  
663 habitat in Australia. *Aust. J. Zool.* 68, 226-233.
- 664 Tse, H., Chan, W.M., Li, K.S., Lau, S.K., Woo, P.C., Yuen, K.Y. 2012. Discovery and  
665 genomic characterization of a novel bat sapovirus with unusual genomic features and  
666 phylogenetic position. *PLoS One* 7, e34987.

- 667 Turnbull, M.G., Douville, R.N. 2018. Related endogenous retrovirus-K elements harbor  
668 distinct protease active site motifs. *Front. Microbiol.* 9, 1577.
- 669 Van Brussel, K., Holmes, E.C. 2022. Zoonotic disease and virome diversity in bats. *Curr.*  
670 *Opin. Virol.* 52, 192-202.
- 671 Vanmechelen, B., Merino, M., Vergote, V., Laenen, L., Thijssen, M., Martí-Carreras, J.,  
672 Claerebout, E., Maes, P. 2021. Exploration of the *Ixodes ricinus* virosphere unveils an  
673 extensive virus diversity including novel coltiviruses and other reoviruses. *Virus Evol.* 7,  
674 veab066.
- 675 Wacharapluesadee, S., Tan, C.W., Maneern, P., Duengkae, P., Zhu, F., Joyjinda, Y.,  
676 Kaewpom, T., Chia, W.N., Ampoot, W., Lim, B.L., Worachotsueptrakun, K., Chen,  
677 V.C., Sirichan, N., Ruchisrisarod, C., Rodpan, A., Noradechanon, K., Phaichana, T.,  
678 Jantararat, N., Thongnumchaima, B., Tu, C., Cramer, G., Stokes, M.M., Hemachudha, T.,  
679 Wang, L.F. 2021. Evidence for SARS-CoV-2 related coronaviruses circulating in bats  
680 and pangolins in Southeast Asia. *Nat. Commun.* 12, 972.
- 681 Wang, J., Anderson, D.E., Halpin, K., Hong, X., Chen, H., Walker, S., Valdeter, S., van der  
682 Heide, B., Neave, M.J., Bingham, J., O'Brien, D., Eagles, D., Wang, L.F., Williams, D.T.  
683 2021. A new Hendra virus genotype found in Australian flying foxes. *Virol. J.* 18, 197.
- 684 Weiss, S., Dabrowski, P.W., Kurth, A., Leendertz, S.A.J., Leendertz, F.H. 2017. A novel  
685 Coltivirus-related virus isolated from free-tailed bats from Côte d'Ivoire is able to infect  
686 human cells *in vitro*. *Virol. J.* 14, 181.
- 687 Williams, N.S.G., McDonnell, M.J., Phelan, G.K., Keim, L.D., Van Der Ree, R. 2006. Range  
688 expansion due to urbanization: Increased food resources attract Grey-headed Flying-  
689 foxes (*Pteropus poliocephalus*) to Melbourne. *Austral. Ecol.* 31, 190-198.
- 690 Wu, Z., Yang, L., Ren, X., He, G., Zhang, J., Yang, J., Qian, Z., Dong, J., Sun, L., Zhu, Y.,  
691 Du, J., Yang, F., Zhang, S., Jin, Q. 2016. Deciphering the bat virome catalog to better  
692 understand the ecological diversity of bat viruses and the bat origin of emerging  
693 infectious diseases. *ISME J.* 10, 609-620.
- 694 Xu, Z., Feng, Y., Chen, X., Shi, M., Fu, S., Yang, W., Liu, W.J., Gao, G.F., Liang, G. 2022.  
695 Virome of bat-infesting arthropods: highly divergent viruses in different vectors. *J. Virol.*  
696 96, e0146421.
- 697 Yang, Z., He, B., Lu, Z., Mi, S., Jiang, J., Liu, Z., Tu, C., Gong, W. 2021. Mammalian  
698 birnaviruses identified in pigs infected by classical swine fever virus. *Virus Evol.* 7,  
699 veab084.

- 700 Yinda, C.K., Conceição-Neto, N., Zeller, M., Heylen, E., Maes, P., Ghogomu, S.M., Van  
701 Ranst, M., Matthijnssens, J. 2017. Novel highly divergent sapoviruses detected by  
702 metagenomics analysis in straw-colored fruit bats in Cameroon. *Emerg. Microbes Infect.*  
703 6, e38.
- 704 Yob, J.M., Field, H., Rashdi, A.M., Morrissy, C., van der Heide, B., Rota, P., bin Adzhar, A.,  
705 White, J., Daniels, P., Jamaluddin, A., Ksiazek, T. 2001. Nipah virus infection in bats  
706 (order Chiroptera) in peninsular Malaysia. *Emerg. Infect. Dis.* 7, 439-441.
- 707 Zhou, H., Ji, J., Chen, X., Bi, Y., Li, J., Wang, Q., Hu, T., Song, H., Zhao, R., Chen, Y., Cui,  
708 M., Zhang, Y., Hughes, A.C., Holmes, E.C., Shi, W. 2021. Identification of novel bat  
709 coronaviruses sheds light on the evolutionary origins of SARS-CoV-2 and related  
710 viruses. *Cell* 184, 4380-4391.e14.
- 711 Zhou, P., Yang, X.L., Wang, X.G., Hu, B., Zhang, L., Zhang, W., Si, H.R., Zhu, Y., Li, B.,  
712 Huang, C.L., Chen, H.D., Chen, J., Luo, Y., Guo, H., Jiang, R.D., Liu, M.Q., Chen, Y.,  
713 Shen, X.R., Wang, X., Zheng, X.S., Zhao, K., Chen, Q.J., Deng, F., Liu, L.L., Yan, B.,  
714 Zhan, F.X., Wang, Y.Y., Xiao, G.F., Shi, Z.L. 2020. A pneumonia outbreak associated  
715 with a new coronavirus of probable bat origin. *Nature* 579, 270-273.
- 716 Zhu, W., Lomsadze, A., Borodovsky, M. 2010. *Ab initio* gene identification in metagenomic  
717 sequences. *Nucleic Acids Res.* 38, e132.
- 718 Zhu, W., Yang, J., Lu, S., Jin, D., Pu, J., Wu, S., Luo, X.L., Liu, L., Li, Z., Xu, J. 2022. RNA  
719 virus diversity in birds and small mammals from Qinghai-Tibet plateau of China. *Front.*  
720 *Microbiol.* 13, 780651.
- 721
